# Supplementary material for: Cross-cultural adaptation and validation of the Turkish version of the Pregnancy-Specific Anxiety Tool (PSAT-TR): a psychometric study
Source: Research Square preprint supplement (doi:10.21203/rs.3.rs-7834432/v1), 2025-11-19
Supplement: Supplementary file 1 [file 1cabe7a79a9e6c5c4562db7c.docx]

Supplementary Table S6. Comparison of PSAT, PRAQ-R2, and STAI-State total scores across pregnancy trimesters

| Scale | 1st Trimester (Mean ± SD) | 2nd Trimester (Mean ± SD) | 3rd Trimester (Mean ± SD) | p value |
| --- | --- | --- | --- | --- |
| **PSAT Score** | 10.45 ± 0.82 | 7.95 ± 1.01 | 14.17 ± 2.01 | <0.001 |
| **PRAQ-R2 Total** | 26.57 ± 6.97 | 20.87 ± 6.72 | 32.23 ± 9.11 | <0.001 |
| **STAI-State Total** | 35.73 ± 6.02 | 31.82 ± 7.28 | 39.90 ± 8.38 | <0.001 |

*Legend.* Values are presented as mean ± standard deviation (SD).Group comparisons were conducted using the Kruskal–Wallis test.
