# Supplementary material for: Cross-cultural adaptation and validation of the Turkish version of the Pregnancy-Specific Anxiety Tool (PSAT-TR): a psychometric study
Source: Research Square preprint supplement (doi:10.21203/rs.3.rs-7834432/v1), 2025-11-19
Supplement: Supplementary file 2 [file 45e3a2e966180ba5ca07b417.xlsx]

## Sheet: Sayfa1
HASTA ID	Yaş	Eğitim Durumu (1-ilkokul, 2-ortaokul, 3-lise, 4-üniversite, 5- yüksekokul, 6- yükseklisans )	Meslek (ev hanımı 1, öğretmen -2, tekstil -3, esnaf-4, memur-5, avukat-6	Medeni Durum (bekar 0, evli -1)	Parite	Gebelik Haftası	plansız gebelik - 0, planlı gebelik -1)	kötü obstetrki öykü (1- düşük, 2-serklaj, 3-erkendoğum, 4- ölü doğum, 5- iugr, 6 preeklampsi	Mevcut komplikasyon (0-yok, 1 GDM, 2,GHT,3-iugr )	Geçmişte Psikiyatrik Öykü (1- depresif epizod, 2 bipolar bozukluk, 3- anksiyete bozukluğu	Gebelikte Psikiyatrik İlaç ve tanı (0- yok)	Aile desteği (0- yok, 1 - var)	STAI-S	1.soru	2.soru	3.soru	4.soru	5.soru	6.soru	7.soru	8.soru	9.soru	10.soru	11.soru	12.soru	13.soru	14.soru	15.soru	16.soru	17.soru	18.soru	19.soru	20.soru	STAİ- STATE total puan	PRAQ-R2	1.soru	2.soru	3.soru	4.soru	5.soru	6.soru	7.soru	8.soru	9.soru	10.soru	11.soru	PRAQ-R2 F1(DOĞUM YAPMA KORKUSU)	PRAQ-R2 F2(FİZİKSEL VE ZİHİNSEL ENGELLİ BİR ÇOCUK DOĞURMA ENDİŞESİ	PRAQ-R2 F3 (KENDİ GÖRÜNÜMÜYLE İLGİLİ ENDİŞE)
1	29	4	2	1	0	28	1	1	0	0	0	1		4	4	2	1	3	1	1	2	3	2	2	1	1	1	4	3	1	1	3	3	33		4	4	4	3	3	3	2	3	2	3	2	14	10	9
2	26	3	1	1	0	29	1	1	0	0	0	1		2	4	1	1	3	1	1	2	2	3	3	1	1	1	3	3	2	1	1	1	37		3	3	3	3	3	3	3	1	2	2	2	10	9	9
3	28	4	2	1	1	30	0	0	0	0	0	1		3	3	1	1	2	1	1	1	3	3	2	1	1	1	2	2	1	1	2	3	39		3	3	5	5	5	2	5		4	4	4	8	17	15
4	21	3	1	1	0	31	1	0	1	0	0	1		2	2	3	1	2	1	3	2	4	2	2	1	1	1	1	1	3	2	2	2	52		4	5	4	4	2	4	2	5	4	5	5	18	18	8
5	32	3	1	1	1	32	1	0	0	0	0	1		2	1	1	2	2	1	3	1	3	2	1	1	1	1	1	2	2	2	3	2	50		4	4	1	4	1	1	4	0	4	1	4	9	13	6
6	31	5	1	1	1	14	0	2	0	0	0	1		3	3	1	1	3	1	1	2	2	3	3	1	1	1	3	2	1	2	3	3	34		2	2	3	1	2	1	3	0	1	5	5	5	12	8
7	26	3	1	1	1	15	1	3	2	0	0	1		4	4	1	1	4	1	2	4	1	4	4	1	1	1	4	4	1	1	2	4	23		3	2	2	2	2	2	2	0	2	2	2	7	8	6
8	31	1	1	1	1	6	0	0	0	0	0	1		3	4	3	1	2	2	2	1	2	2	1	1	1	2	2	1	1	3	3	2	47		1	1	5	2	2	5	5	0	4	4	4	7	14	12
9	30	3	1	1	0	16	1	0	0	0	0	1		3	4	1	1	3	1	2	3	2	3	4	1	1	1	3	4	1	3	4	4	29		3	3	2	1	1	2	1	3	2	2	2	11	7	4
10	26	3	1	1	0	17	1	0	0	0	0	1		4	3	1	1	4	1	1	2	2	3	3	1	1	1	3	3	1	1	2	3	31		3	3	2	2	2	3	2	3	2	2	2	12	8	6
11	25	1	1	1	0	18	1	0	0	0	0	0		2	2	2	2	2	2	1	2	2	2	2	2	2	2	2	2	2	2	2	2	49		2	2	2	2	2	2	2	2	2	2	2	8	8	6
12	29	1	1	1	3	33	0	3	0	0	0	1		2	1	3	1	1	2	3	3	4	2	2	2	2	3	2	2	2	3	2	2	56		1	3	4	2	2	1	1	0	1	5	2	5	10	7
13	33	2	1	1	2	34	0	4	0	0	0	1		3	4	1	1	1	2	2	2	2	3	1	1	1	1	1	3	1	2	3	3	40		1	1	1	1	1	1	1	0	1	2	2	3	6	3
14	34	3	1	1	1	7	0	1	0	0	0	1		4	3	1	1	3	1	1	2	1	3	3	1	1	1	3	3	1	1	2	3	31		3	4	1	1	2	4	2	0	2	2	2	11	7	5
15	26	4	5	1	0	35	1	0	0	0	0	1		3	4	1	1	3	1	1	1	4	1	3	1	1	1	2	2	4	1	3	3	41		5	5	5	5	2	5	4	5	5	5	5	20	20	11
16	31	1	1	1	3	36	0	0	0	0	0	1		2	3	2	3	2	3	2	3	2	3	2	3	2	3	2	3	2	3	2	3	50		3	3	3	3	3	3	3	0	3	3	3	9	12	9
17	20	1	1	1	1	19	0	1	0	0	0	0		3	3	1	1	3	2	1	2	1	3	3	1	1	1	3	3	1	1	2	3	33		1	4	4	1	1	2	1	0	2	2	2	7	7	6
18	25	3	1	1	1	20	1	1	0	0	0	1		3	3	1	1	2	1	1	2	2	2	2	1	1	1	2	2	2	1	3	3	38		3	1	4	5	5	5	5	0	5	2	5	9	17	14
19	26	1	1	1	1	37	1	0	0	0	0	1		2	2	2	1	2	1	2	2	3	2	3	1	1	2	2	2	3	1	1	2	47		1	1	3	5	2	1	1	0	3	3	1	3	12	6
20	30	4	1	1	1	21	1	0	0	0	0	1		4	4	1	1	4	4	4	4	1	4	4	1	1	1	4	4	1	4	4	4	29		1	5	1	1	1	1	1	0	1	1	1	7	4	3
21	36	1	1	1	4	38	0	1.4	0	0	0	0		2	3	2	4	4	1	1	2	1	2	3	1	1	1	4	4	1	4	4	4	35		4	5	5	2	3	3	2	0	1	1	1	12	5	10
22	25	3	1	1	0	22	1	0	0	0	0	1		3	3	1	1	3	1	1	2	1	3	3	1	1	1	3	3	1	1	3	3	31		4	4	1	2	2	2	2	4	4	2	4	14	12	5
23	19	3	1	1	0	8	1	0	0	0	0	0		3	3	1	1	3	1	1	1	1	3	4	1	1	2	3	3	1	1	4	3	31		3	3	1	1	2	3	3	3	1	1	1	12	4	6
24	25	3	1	1	1	23	0	1	0	0	0	1		4	4	1	1	4	3	3	3	1	4	4	1	1	1	2	3	1	1	3	4	29		2	3	1	1	1	3	1	0	1	1	1	8	4	3
25	31	1	1	1	2	9	1	1	0	0	0	1		1	1	1	3	2	1	1	4	3	4	3	2	1	1	3	1	1	1	3	3	40		1	1	2	2	1	2	1	0	2	1	2	4	7	4
26	32	1	3	1	1	24	0	0	0	0	0	1		3	2	1	1	3	1	2	1	2	2	4	1	2	1	1	2	2	1	2	2	42		2	4	2	2	2	2	2	0	2	2	2	8	8	6
27	31	3	4	1	1	39	1	0	0	0	0	1		1	3	2	1	1	2	4	1	4	1	4	1	1	1	1	1	2	1	2	2	52		5	5	1	4	1	1	1	0	4	4	4	11	16	3
28	20	3	1	1	0	10	1	0	0	0	0	1		2	4	1	1	4	1	2	2	3	2	4	1	1	1	4	2	1	2	4	4	32		3	5	5	1	1	1	5	5	1	5	1	14	8	11
29	22	1	1	1	0	11	1	1	0	0	0	1		2	2	1	1	1	1	1	2	2	2	3	1	1	1	1	2	1	1	3	3	40		5	5	5	4	2	5	5	5	1	1	1	20	7	12
30	21	1	1	1	0	25	1	0	0	0	0	1		4	4	2	1	3	1	1	1	2	2	3	2	2	2	3	2	2	3	3	2	41		1	3	1	1	4	3	4	4	2	1	2	11	6	9
31	22	3	1	1	0	26	1	0	0	3	0	1		3	4	1	3	3	2	1	3	2	2	3	1	1	1	3	3	2	2	3	3	36		3	4	1	1	1	3	1	3	1	1	1	13	4	3
32	23	1	1	1	0	27	0	0	0	0	0	1		4	4	4	4	4	1	1	2	1	4	4	1	1	1	4	4	1	1	4	4	28		1	2	1	3	1	5	1	2	1	3	1	10	8	3
33	32	4	5	1	0	12	1	0	0	0	0	1		2	2	1	1	3	2	2	1	2	2	2	1	2	1	2	2	2	1	1	2	46		4	4	5	5	5	4	5	5	3	3	3	17	14	15
34	22	3	1	1	1	13	1	1	0	0	0	1		2	3	2	1	2	3	2	2	1	3	3	1	1	1	2	4	1	2	2	4	38		3	4	3	4	5	5	1	0	1	1	1	12	7	9
35	34	3	1	1	2	14	1	0	0	0	0	1		4	4	1	1	3	3	1	3	1	4	4	1	3	1	4	4	1	1	4	4	26		2	2	2	2	2	5	2	0	2	2	2	9	8	6
36	21	2	1	1	0	15	1	0	0	0	0	1		2	4	1	1	3	2	1	2	2	2	3	1	1	1	1	3	2	1	2	2	39		2	3	3	1	1	1	1	3	1	1	1	9	4	5
37	30	2	1	1	2	16	1	1	1	0	0	1		4	4	1	1	3	1	1	2	1	4	4	1	1	1	3	2	3	1	4	4	28		4	3	1	1	1	5	3	0	1	1	1	12	4	5
38	25	1	1	1	1	17	1	0	0	0	0	1		4	4	4	1	3	3	3	3	2	3	3	3	2	2	2	3	1	1	3	3	41		3	4	2	3	1	1	1	0	2	2	2	8	9	4
39	34	3	1	1	1	28	0	0	0	0	0	1		2	4	1	1	4	1	1	2	1	3	3	1	1	1	4	3	1	1	4	4	27		3	3	3	3	3	3	3	0	3	3	3	9	12	9
40	20	1	1	1	0	6	1	1	0	0	0	1		3	4	2	1	3	2	2	2	2	3	2	1	2	1	3	2	2	1	3	2	39		4	3	1	3	1	5	1	4	3	2	3	16	11	3
41	22	3	1	1	0	18	1	0	0	2	0	1		4	4	1	1	4	1	1	4	1	4	4	1	1	1	4	4	1	1	4	4	20		3	3	2	2	2	3	1	3	2	3	1	12	8	5
42	34	3	3	1	2	19	1	0	0	0	0	1		2	4	1	1	2	3	2	2	2	2	3	1	1	1	2	2	2	1	2	3	41		3	5	1	5	5	5	2	0	1	3	1	13	10	8
43	27	1	1	1	2	7	0	1	0	0	0	1		4	4	1	1	4	2	2	2	1	4	4	1	1	2	4	2	1	1	2	3	30		4	4	1	3	1	3	1	0	1	3	3	11	10	3
44	35	3	3	1	0	29	1	0	0	0	0	1		2	3	1	3	3	3	1	3	3	2	1	1	1	3	3	3	1	2	4	3	42		4	4	4	2	2	4	4	4	5	5	5	16	17	10
45	25	6	5	1	0	30	1	0	0	0	0	1		4	4	1	1	4	4	1	1	1	4	4	1	1	1	4	4	1	1	4	4	26		5	5	5	1	5	5	5	5	1	5	1	20	8	15
46	26	2	3	1	0	20	0	0	0	0	0	1		2	3	2	1	3	2	1	2	1	2	3	1	2	1	2	2	1	1	2	2	40		1	3	4	1	1	1	1	3	1	1	1	8	4	6
47	31	3	1	1	2	21	1	0	0	0	0	1		3	3	1	1	3	1	2	2	1	3	3	1	1	1	3	3	1	1	3	3	32		3	4	3	1	1	3	3	0	3	2	3	10	9	7
48	30	1	1	1	1	31	1	3	0	0	0	1		3	4	1	1	3	4	1	2	1	4	4	1	1	1	4	4	1	1	4	3	28		2	2	3	2	2	2	3	0	1	2	2	6	7	8
49	31	4	6	1	0	8	1	1	0	0	0	1		4	4	1	1	2	1	2	4	1	2	3	1	1	1	2	4	1	1	2	4	30		3	4	3	3	2	3	2	4	3	4	4	14	14	7
50	32	5	1	1	2	9	0	0	0	0	0	1		3	3	1	1	4	1	1	3	1	4	4	1	1	1	4	4	1	1	2	2	27		1	3	2	1	1	3	2	0	1	1	1	7	4	5
51	24	2	1	1	0	10	1	0	0	0	0	1		4	4	1	1	3	4	1	3	1	4	3	1	1	1	4	3	1	1	3	4	28		2	4	2	2	2	2	2	4	2	4	4	12	12	6
52	29	3	1	1	0	22	1	0	0	0	0	1		4	4	1	1	4	2	1	3	1	4	4	1	1	1	4	4	1	2	4	4	23		1	3	1	1	1	1	1	4	1	1	1	9	4	3
53	30	2	1	1	3	32	0	0	0	0	0	1		2	2	2	2	2	1	2	1	1	2	4	2	4	3	2	4	1	4	4	4	45		1	1	1	1	3	5	1	0	4	1	5	7	11	5
54	26	2	1	1	1	23	1	0	0	0	0	1		4	3	2	2	3	2	2	2	2	3	4	2	2	2	2	2	2	2	2	4	41		1	3	1	1	1	1	1	0	1	1	1	5	4	3
55	39	3	1	1	2	11	0	0	0	0	0	1		3	4	1	4	4	1	2	2	2	3	2	1	1	1	4	4	1	2	4	4	32		5	5	1	1	5	5	1	0	1	1	1	15	4	7
56	33	2	1	1	1	12	1	1.5	0	0	0	1		4	4	1	1	4	1	3	2	2	3	3	1	1	1	2	3	1	1	3	3	32		4	4	3	3	1	1	1	0	4	4	4	9	15	5
57	22	2	1	1	0	13	1	0	0	0	0	1		4	4	1	1	2	1	1	2	1	4	1	1	1	4	4	4	2	3	3	3	35		3	5	1	3	1	3	1	4	2	2	4	15	11	3
58	34	1	1	1	2	6	1	1	0	0	0	1		4	3	1	1	3	1	1	2	2	4	1	1	3	1	3	1	1	4	4	4	37		1	1	1	3	1	3	3	0	3	3	1	5	10	5
59	33	5	5	1	1	24	1	0	0	0	0	1		4	4	1	1	4	1	1	2	4	4	4	1	1	1	3	4	1	2	4	4	27		2	2	2	2	2	2	1	0	2	2	2	6	8	5
60	27	3	1	1	1	33	1	0	0	0	0	1		2	2	1	1	2	2	2	2	2	2	2	1	1	1	2	2	1	1	2	3	42		4	4	3	4	2	3	3	0	3	3	2	11	12	8
61	28	3	1	1	0	34	1	0	0	0	0	1		4	4	1	1	3	1	1	1	1	3	3	1	2	2	3	3	1	2	3	3	33		2	2	2	3	1	2	2	3	3	3	3	9	12	5
62	35	3	1	1	1	35	1	4	0	0	0	1		3	4	1	1	4	1	2	3	2	2	3	1	1	1	3	3	1	1	3	3	31		1	4	1	3	1	3	4	0	1	5	4	8	13	6
63	30	1	1	1	1	36	1	0	0	0	0	1		3	4	3	1	3	2	2	3	2	3	4	1	1	1	1	4	1	2	4	4	33		3	4	2	3	1	2	2	0	4	4	3	9	14	5
64	40	2	1	1	1	25	1	1	0	0	0	1		3	3	1	1	2	1	3	1	3	4	1	4	1	1	3	4	1	2	4	4	39		1	1	1	1	1	1	1	0	1	1	1	3	4	3
65	25	4	1	1	0	37	1	0	0	0	0	1		3	3	1	1	3	1	2	2	2	2	3	1	1	1	2	3	2	2	3	3	37		4	4	3	4	4	4	3	5	5	5	5	17	19	10
66	35	3	1	1	0	26	0	0	3	0	0	1		4	4	1	1	3	1	1	2	1	4	4	1	1	1	2	4	1	1	2	3	28		2	3	1	1	1	3	1	3	4	1	1	11	7	3
67	25	4	1	1	0	7	1	0	0	0	0	1		3	3	1	1	3	1	2	2	2	2	3	1	1	1	2	2	1	1	2	2	38		4	4	4	2	2	2	2	4	3	3	3	14	11	8
68	31	3	1	1	0	27	0	0	0	0	0	1		4	4	1	1	4	1	1	3	2	4	4	1	2	2	3	4	2	1	4	4	26		3	3	3	3	3	3	3	3	3	3	3	12	12	9
69	25	3	1	1	0	14	1	0	0	0	0	1		4	4	1	1	2	1	1	2	1	2	4	1	1	1	4	4	2	1	4	4	27		2	3	2	2	2	2	2	2	2	4	2	9	10	6
70	24	3	1	1	1	15	0	0	0	0	0	1		4	4	1	1	1	1	1	3	1	4	4	1	1	1	3	3	1	3	3	4	29		1	1	1	1	1	1	1	0	1	1	1	3	4	3
71	26	3	1	1	0	16	1	0	0	0	0	1		4	4	1	1	3	2	1	3	1	3	4	1	1	1	3	4	1	1	3	3	27		2	2	2	2	2	3	2	4	2	2	2	11	8	6
72	29	1	1	1	1	38	1	0	0	0	0	1		1	1	2	2	3	2	3	1	3	1	2	1	2	2	1	1	2	1	3	3	53		5	5	5	2	2	5	5	0	2	4	2	15	10	12
73	26	1	1	1	2	17	0	0	0	0	0	1		4	4	1	1	4	2	1	4	1	2	3	1	1	2	3	4	1	1	4	4	26		2	2	2	2	2	2	2	0	2	1	1	6	6	6
74	32	4	2	1	0	8	1	0	0	0	0	1		3	2	1	2	3	1	2	2	2	2	3	1	1	1	2	2	2	2	3	2	41		4	4	2	2	2	2	2	1	1	1	2	11	6	6
75	25	2	1	1	1	18	1	0	0	0	0	1		3	3	1	1	3	1	1	3	1	3	3	1	2	1	3	3	1	2	3	4	31		3	4	1	1	1	1	1	0	1	1	1	8	4	3
76	22	3	1	1	1	19	1	0	0	0	0	1		2	4		1	1	4	2	1	3	1	3	3	1	1	2	2	3	2	1	4	49		3	4	4	2	2	2	1	0	2	2	2	9	8	7
77	34	1	1	1	2	20	1	1	0	0	0	1		4	4	1	1	4	1	4	4	1	4	4	1	1	1	4	4	1	4	4	4	26		2	3	2	2	1	1	1	0	1	1	1	6	5	4
78	26	3	1	1	0	21	1	0	0	0	0	1		4	4	1	1	4	1	1	4	1	4	4	1	1	1	4	4	1	2	4	4	21		2	4	2	2	1	2	2	3	2	2	2	11	8	5
79	28	3	1	1	1	9	0	0	0	0	0	1		3	3	3	1	3	1	1	2	1	3	1	1	1	1	3	3	1	1	3	3	35		4	4	2	2	2	2	2	0	2	2	2	10	8	6
80	24	3	1	1	1	10	0	1	0	0	0	1		3	3	2	1	3	2	2	3	2	3	3	2	1	2	2	2	2	1	3	2	40		3	4	2	4	2	4	2	0	2	2	2	11	10	6
81	19	2	1	1	0	22	1	1	0	0	0	1		4	3	1	1	3	1	1	1	1	3	4	1	1	1	2	2	1	1	2	2	34		3	4	3	4	1	1	1	4	4	1	4	12	13	5
82	36	1	1	1	2	11	0	0	0	0	0	1		4	4	1	1	2	2	3	2	2	4	2	1	1	1	1	2	2	1	2	2	40		5	5	1	5	1	5	1	0	1	1	1	15	8	3
83	33	4	5	1	1	23	0	1	0	0	0	1		4	4	1	1	3	1	1	2	2	4	4	1	1	1	2	2	1	1	3	3	30		2	2	2	2	2	2	2	0	2	2	2	6	8	6
84	25	4	1	1	0	24	1	0	0	0	0	1		4	4	1	1	4	1	2	4	1	4	4	1	1	1	4	4	1	1	4	4	21		3	3	1	1	1	1	1	3	1	1	1	10	4	3
85	28	3	1	1	1	25	0	0	0	0	0	1		3	3	2	1	2	2	3	2	2	2	3	1	1	1	2	2	2	2	1	2	45		5	4	2	2	2	2	2	0	2	2	2	11	8	6
86	23	1	1	1	1	26	1	3	0	0	0	1		4	4	4	1	4	1	1	3	1	4	4	1	1	4	3	3	1	2	3	3	32		3	4	1	2	1	2	2	0	2	2	1	9	7	4
87	33	3	1	1	1	12	1	1.3	0	0	0	1		4	4	1	1	4	3	1	3	1	4	4	1	1	4	4	4	1	4	4	4	29		1	3	1	5	1	1	5	0	1	1	1	5	8	7
88	21	3	1	1	1	27	0	1	0	0	0	1		3	4	2	1	3	2	1	4	2	4	4	1	1	1	4	4	1	1	4	4	25		4	1	2	3	1	1	1	0	2	1	1	6	7	4
89	21	1	1	1	1	13	1	0	0	1	0	1		2	4	2	1	1	3	2	1	2	2	3	1	1	1	1	3	2	1	1	1	47		4	3	1	3	1	1	1	0	2	1	1	8	7	3
90	35	1	1	1	0	14	0	0	0	0	0	1		3	4	1	1	3	1	1	3	1	3	3	1	1	1	3	3	1	1	3	3	29		2	1	2	2	1	2	2	2	2	2	1	7	7	5
91	19	3	1	1	0	39	1	0	0	0	0	1		2	2	1	3	2	3	1	1	3	2	3	1	1	1	2	3	2	1	2	2	46		5	5	4	2	2	5	4	5	1	1	1	20	5	10
92	24	3	1	1	1	15	0	1	0	1	0	1		4	4	4	1	4	1	1	4	1	4	4	1	1	1	4	4	1	2	4	4	24		3	4	2	5	1	3	1	0	5	5	5	10	20	4
93	27	3	1	1	0	28	1	1	0	0	0	1		4	4	1	1	4	1	1	4	1	4	4	1	1	1	4	4	4	1	4	4	23		5	5	2	4	2	3	2	5	2	4	2	18	12	6
94	32	1	1	1	2	29	0	0	0	0	0	1		2	2	1	2	2	1	3	1	3	1	2	1	3	2	2	1	2	3	2	2	54		5	5	4	2	2	2	2	0	1	2	1	12	6	8
95	33	3	1	1	2	16	0	0	0	0	0	1		4	4	1	4	1	1	1	2	1	4	4	1	1	4	4	1	1	4	1	4	40		2	3	1	1	2	2	1	0	1	1	1	7	4	4
96	23	1	1	1	1	17	1	0	0	0	0	1		4	4	1	1	4	4	1	4	1	4	4	1	1	1	4	4	1	1	4	4	23		5	4	1	2	1	1	1	0	1	5	1	10	9	3
97	26	1	3	1	1	30	0	1	0	0	0	1		2	4	4	1	1	1	3	1	2	4	2	1	1	1	4	2	1	3	3	4	41		5	1	5	1	5	4	1	0	5	5	5	10	16	11
98	31	4	5	1	1	18	0	0	0	0	0	1		3	3	2	1	3	1	2	3	2	3	3	2	1	1	3	3	2	2	3	4	35		2	2	2	2	2	2	2	0	2	2	2	6	8	6
99	33	2	1	1	1	6	1	1	0	0	0	1		3	3	2	1	2	1	2	2	2	3	3	1	1	1	3	4	4	3	3	3	39		3	4	1	2	1	2	4	0	1	4	2	9	9	6
100	29	1	1	1	4	31	1	0	0	0	0	1		4	4	2	1	2	2	1	3	3	2	2	4	4	2	1	2	2	3	3	2	49		1	1	1	4	2	5	1	0	5	2	2	7	13	4
101	30	2	1	1	1	7	1	1	0	0	0	1		3	2	1	1	2	2	1	2	2	2	3	1	1	2	2	3	1	1	2	2	40		1	4	3	3	1	3	1	0	1	1	1	8	6	5
102	36	5	2	1	2	19	1	1	0	0	0	1		2	3	1	1	2	1	1	2	2	2	4	1	1	1	2	2	1	1	2	3	37		2	2	3	3	2	2	2	0	2	2	2	6	9	7
103	26	3	1	1	0	32	0	1	0	0	0	1		3	4	1	1	3	3	2	3	2	2	2	1	1	1	2	3	1	2	1	2	40		4	4	4	1	1	4	4	4	1	4	1	16	7	9
104	24	3	1	1	0	8	1	0	0	0	0	1		4	4	1	1	4	1	2	3	1	3	3	1	1	1	3	3	2	1	3	3	29		3	4	2	3	2	3	2	4	3	3	3	14	12	6
105	31	5	1	1	1	20	0	6	0	0	0	1		4	4	1	1	4	1	2	2	1	4	4	1	1	1	4	4	1	1	2	3	26		2	3	1	2	1	1	1	0	3	1	2	6	8	3
106	31	3	1	1	2	21	1	1	0	0	0	1		2	3	1	1	3	1	2	2	2	3	1	1	1	3	3	2	2	1	2	2	42		4	5	4	3	2	3	3	0	3	3	3	12	12	9
107	37	2	1	1	2	33	0	1	0	0	0	1		2	3	4	1	3	2	2	2	2	3	2	4	4	2	3	2	2	2	3	2	50		5	5	4	4	2	3	3	0	1	2	3	13	10	9
108	19	3	1	1	0	9	1	0	0	0	0	1		3	4	1	1	3	1	2	2	2	3	2	1	1	1	3	3	1	1	2	3	34		4	5	2	2	2	5	4	5	4	5	4	19	15	8
109	26	5	1	1	0	22	1	1	0	0	0	1		4	3	1	1	4	1	1	2	1	3	4	1	1	1	3	4	1	1	2	2	29		2	3	1	1	1	1	1	3	2	1	2	9	6	3
110	38	3	4	1	0	34	0	0	0	0	0	1		2	3	3	2	2	1	3	2	1	2	3	2	2	2	3	3	2	3	3	2	46		4	3	4	4	4	3	4	1	2	3	3	11	12	12
111	28	2	1	1	1	10	0	0	0	0	0	1		2	2	1	1	2	2	2	2	2	2	2	1	1	1	2	2	2	2	2	2	45		4	3	2	3	2	2	2	0	2	2	2	9	9	6
112	28	2	1	1	0	35	1	0	0	0	0	1		4	4	4	1	4	4	1	4	1	4	4	1	1	1	4	4	1	1	4	4	26		3	4	2	4	1	2	2	4	4	4	4	13	16	5
113	31	3	1	1	1	36	1	0	0	0	0	1		3	3	1	1	1	1	3	1	1	3	1	1	2	2	4	4	2	2	3	2	41		4	4	4	3	3	3	4	0	3	3	3	11	12	11
114	27	4	1	1	1	23	1	0	0	0	0	1		2	3	2	1	3	1	1	2	1	2	2	1	1	2	2	2	1	1	2	2	40		4	4	3	4	2	2	2	0	3	3	3	10	13	7
115	22	3	1	1	0	11	1	1	0	0	0	1		2	4	2	3	2	1	2	2	3	3	2	2	2	2	2	3	2	2	3	3	45		2	1	5	1	1	1	1	5	1	5	5	9	12	7
116	33	2	1	1	0	24	1	1	0	0	0	1		4	4	1	1	3	1	1	1	1	3	3	1	1	1	2	3	1	1	3	3	31		3	4	2	2	2	2	3	4	4	4	2	13	12	7
117	33	2	1	1	2	25	1	0	0	0	0	1		4	4	1	1	4	1	1	3	1	4	4	1	1	1	4	1	1	1	4	4	24		1	1	1	1	1	1	1	0	1	1	1	3	4	3
118	31	6	1	1	0	37	1	0	0	0	0	1		3	4	1	1	3	2	3	2	2	3	3	1	1	1	2	2	2	2	3	3	38		4	5	2	3	1	4	2	5	4	5	4	18	16	5
119	24	2	1	1	1	38	1	0	0	0	0	1		2	3	1	1	2	2	2	2	1	3	3	1	1	1	3	3	1	1	4	4	33		1	4	2	5	1	1	4	0	2	3	1	6	11	7
120	22	2	1	1	0	26	0	1	0	0	0	1		4	4	1	1	3	1	1	3	1	3	4	1	1	1	3	3	1	1	2	3	28		2	2	3	2	1	2	2	3	2	2	2	9	8	6
121	23	3	1	1	1	12	1	0	0	0	0	1		4	3	1	1	3	1	1	4	1	3	3	1	1	1	2	4	1	1	3	3	28		3	2	4	1	1	2	4	0	1	1	1	7	4	9
122	28	2	1	1	1	13	1	1	0	1	0	1		3	4	1	1	4	1	1	2	1	3	4	1	1	1	3	2	1	1	3	4	28		5	5	1	1	5	5	1	0	1	5	1	15	8	7
123	20	3	1	1	0	6	0	0	0	0	0	1		3	4	1	1	3	2	2	2	2	1	2	2	2	2	2	2	2	3	2	3	45		3	3	5	5	5	5	3	5	5	5	5	16	20	13
124	22	2	1	1	0	27	1	0	0	0	0	1		3	4	1	1	3	1	1	4	1	4	3	3	1	1	2	2	1	4	4	4	32		2	4	5	2	5	4	5	3	5	4	5	13	16	15
125	31	1	1	1	2	7	1	0	0	0	0	1		3	4	1	1	4	1	2	3	1	3	4	1	1	1	3	4	1	1	3	3	27		4	4	5	3	3	2	5	0	2	3	2	10	10	13
126	32	3	3	1	0	14	1	0	0	0	0	1		4	4	1	1	2	1	1	4	2	3	4	1	1	1	2	2	2	1	1	1	35		3	3	1	1	1	3	1	3	1	2	2	12	6	3
127	28	1	4	1	0	15	1	0	0	0	0	1		3	3	1	1	3	1	1	3	1	3	4	1	1	1	3	3	1	1	3	3	29		1	1	1	1	1	1	1	1	1	1	1	4	4	3
128	33	2	1	1	3	16	0	0	0	0	0	1		3	4	1	4	4	1	1	3	1	4	4	1	1	1	4	4	1	2	4	4	26		4	4	2	3	1	1	2	0	3	4	4	9	14	5
129	26	3	3	1	0	8	1	0	0	0	0	1		3	3	2	1	3	1	2	3	2	3	3	1	1	1	3	2	1	1	3	3	34		1	1	1	1	5	5	1	5	3	2	2	12	8	7
130	27	1	1	1	2	17	1	0	0	0	0	0		3	3	1	3	3	1	1	3	1	3	3	1	1	1	3	3	1	2	3	3	33		1	1	1	1	1	1	1	0	1	1	1	3	4	3
131	28	5	1	1	1	9	1	1	0	3	0	1		3	3	1	2	2	1	2	3	2	2	1	1	1	1	3	3	1	1	2	3	38		4	4	2	2	2	2	5	0	1	1	1	10	5	9
132	33	2	1	1	1	39	1	0	0	0	0	1		3	4	1	1	4	2	1	2	2	4	4	1	1	1	4	4	2	4	4	4	29		1	5	2	1	1	1	1	0	1	1	1	7	4	4
133	22	2	1	1	1	10	1	0	0	0	0	1		3	4	1	2	2	1	2	2	2	3	1	1	1	1	2	2	1	2	2	3	40		3	4	4	2	1	1	2	0	1	4	4	8	11	7
134	18	1	1	1	0	28	1	1	0	0	0	1		2	4	1	4	3	2	2	2	1	2	4	2	1	2	2	2	2	2	3	3	42		5	5	2	3	2	5	4	5	5	5	5	20	18	8
135	38	2	1	1	2	29	0	1	0	0	0	1		3	4	1	1	3	2	2	2	3	2	3	2	1	2	3	3	2	2	3	3	39		4	1	2	2	2	2	2	0	1	1	4	7	8	6
136	35	2	1	1	0	30	1	0	0	0	0	1		4	2	1	1	4	2	2	2	2	2	3	1	1	2	2	3	1	1	3	2	37		3	5	2	2	1	5	3	5	3	3	4	18	12	6
137	35	1	1	1	2	18	1	0	0	0	0	1		3	3	1	1	4	2	1	4	1	4	4	1	1	1	3	4	1	1	3	3	26		1	4	2	1	1	1	1	0	1	1	1	6	4	4
138	27	1	1	1	2	19	0	0	0	0	0	1		2	3	3	1	4	3	1	2	2	2	3	2	2	3	2	3	2	1	2	3	44		3	2	2	2	2	2	2	0	1	1	1	7	5	6
139	19	3	4	1	0	11	1	0	0	0	0	1		2	4	1	1	3	1	1	3	2	2	1	1	1	1	2	3	2	2	3	3	37		5	5	3	2	1	5	1	5	3	4	2	20	11	5
140	41	1	1	1	2	31	0	0	0	0	0	1		2	3	2	1	2	1	3	1	3	2	3	1	1	1	2	2	1	3	3	3	44		4	4	1	3	1	4	1	0	3	5	5	12	16	3
141	20	2	1	1	0	32	0	0	0	0	0	1		2	4	1	1	3	2	4	2	3	2	2	1	1	1	2	3	2	4	3	3	44		5	5	5	5	2	4	2	5	4	4	5	19	18	9
142	20	3	1	1	0	20	1	0	0	0	0	1		4	4	2	1	4	1	1	4	1	4	4	1	1	1	4	4	1	2	4	4	22		3	3	1	1	1	3	3	3	1	1	1	12	4	5
143	29	1	1	1	2	21	1	1	0	0	0	1		4	4	1	1	4	4	1	3	1	4	4	1	1	1	4	4	3	1	4	4	26		1	1	1	1	1	1	1	0	1	1	1	3	4	3
144	27	1	1	1	1	22	1	1	0	0	0	1		4	4	4	4	4	3	1	4	1	4	4	1	1	1	4	4	1	1	4	4	28		1	2	1	1	1	1	1	0	1	1	1	4	4	3
145	19	3	1	1	0	33	1	0	0	0	0	1		2	2	2	1	2	2	1	1	1	1	3	1	1	2	2	3	1	1	2	3	42		3	5	5	4	3	5	5	5	3	3	4	18	14	13
146	30	1	3	1	0	34	1	0	0	0	0	1		3	4	1	1	4	1	1	3	1	4	1	1	1	1	3	4	1	2	3	4	28		4	5	4	2	1	2	2	3	2	3	3	14	10	7
147	34	3	1	1	3	23	1	4	1	0	0	1		4	4	1	1	4	1	1	2	1	4	4	1	1	1	4	4	1	1	1	4	25		1	1	1	1	1	1	1	0	3	4	3	3	11	3
148	33	1	1	1	2	35	1	0	0	1	0	1		2	2	2	1	2	3	1	2	2	2	3	3	2	2	2	3	2	1	2	2	47		3	1	1	1	1	1	1	0	1	1	1	5	4	3
149	25	3	1	1	0	24	1	0	0	0	0	1		3	3	2	1	3	1	1	2	2	2	3	3	2	1	1	1	3	3	1	2	48		1	4	3	2	1	1	1	3	3	3	3	9	11	5
150	28	2	1	1	0	37	1	0	0	0	0	1		4	4	4	1	4	4	1	4	1	4	4	1	1	1	4	4	1	1	4	4	26		3	4	2	4	1	2	2	4	4	4	4	13	16	5
151	34	3	1	1	2	24	1	0	0	0	0	1		4	4	1	1	3	3	1	3	1	4	4	1	3	1	4	4	1	1	4	4	26		2	2	2	2	2	5	2	0	2	2	2	9	8	6
152	32	1	1	1	2	30	0	0	0	0	0	1		2	2	1	2	2	1	3	1	3	1	2	1	3	2	2	1	2	3	2	2	54		5	5	4	2	2	2	2	0	1	2	1	12	6	8
153	25	3	1	1	0	18	1	0	0	0	0	1		3	3	1	1	3	1	1	2	1	3	3	1	1	1	3	3	1	1	3	3	31		4	4	1	2	2	2	2	4	4	2	4	14	12	5
154	22	2	1	1	1	11	1	0	0	0	0	1		3	4	1	2	2	1	2	2	2	3	1	1	1	1	2	2	1	2	2	3	40		3	4	4	2	1	1	2	0	1	4	4	8	11	7
155	34	1	1	1	2	10	1	1	0	0	0	1		4	3	1	1	3	1	1	2	2	4	1	1	3	1	3	1	1	4	4	4	37		1	1	1	3	1	3	3	0	3	3	1	5	10	5
156	26	3	1	1	0	33	0	1	0	0	0	1		3	4	1	1	3	3	2	3	2	2	2	1	1	1	2	3	1	2	1	2	40		4	4	4	1	1	4	4	4	1	4	1	16	7	9
157	25	4	1	1	0	11	1	0	0	0	0	1		3	3	1	1	3	1	2	2	2	2	3	1	1	1	2	2	1	1	2	2	38		4	4	4	2	2	2	2	4	3	3	3	14	11	8
158	28	4	2	1	1	38	0	0	0	0	0	1		3	3	1	1	2	1	1	1	3	3	2	1	1	1	2	2	1	1	2	3	39		3	3	5	5	5	2	5	0	4	4	4	8	17	15
159	33	2	1	1	1	33	1	0	0	0	0	1		3	4	1	1	4	2	1	2	2	4	4	1	1	1	4	4	2	4	4	4	29		1	5	2	1	1	1	1	0	1	1	1	7	4	4
160	33	2	1	1	1	8	1	1.5	0	0	0	1		4	4	1	1	4	1	3	2	2	3	3	1	1	1	2	3	1	1	3	3	32		4	4	3	3	1	1	1	0	4	4	4	9	15	5
161	30	1	1	1	1	36	1	0	0	0	0	1		3	4	3	1	3	2	2	3	2	3	4	1	1	1	1	4	1	2	4	4	33		3	4	2	3	1	2	2	0	4	4	3	9	14	5
162	22	2	1	1	0	9	1	0	0	0	0	1		4	4	1	1	2	1	1	2	1	4	1	1	1	4	4	4	2	3	3	3	35		3	5	1	3	1	3	1	4	2	2	4	15	11	3
163	21	3	1	1	1	23	0	1	0	0	0	1		3	4	2	1	3	2	1	4	2	4	4	1	1	1	4	4	1	1	4	4	25		4	1	2	3	1	1	1	0	2	1	1	6	7	4
164	33	2	1	1	3	8	0	0	0	0	0	1		3	4	1	4	4	1	1	3	1	4	4	1	1	1	4	4	1	2	4	4	26		4	4	2	3	1	1	2	0	3	4	4	9	14	5
165	28	3	1	1	0	34	1	0	0	0	0	1		4	4	1	1	3	1	1	1	1	3	3	1	2	2	3	3	1	2	3	3	33		2	2	2	3	1	2	2	3	3	3	3	9	12	5
166	19	3	1	1	0	28	1	0	0	0	0	1		2	2	2	1	2	2	1	1	1	1	3	1	1	2	2	3	1	1	2	3	42		3	5	5	4	3	5	5	5	3	3	4	18	14	13
167	26	2	3	1	0	16	0	0	0	0	0	1		2	3	2	1	3	2	1	2	1	2	3	1	2	1	2	2	1	1	2	2	40		1	3	4	1	1	1	1	3	1	1	1	8	4	6
168	23	3	1	1	1	7	1	0	0	0	0	1		4	3	1	1	3	1	1	4	1	3	3	1	1	1	2	4	1	1	3	3	28		3	2	4	1	1	2	4	0	1	1	1	7	4	9
169	32	5	1	1	2	13	0	0	0	0	0	1		3	3	1	1	4	1	1	3	1	4	4	1	1	1	4	4	1	1	2	2	27		1	3	2	1	1	3	2	0	1	1	1	7	4	5
170	30	2	1	1	2	26	1	1	1	0	0	1		4	4	1	1	3	1	1	2	1	4	4	1	1	1	3	2	3	1	4	4	28		4	3	1	1	1	5	3	0	1	1	1	12	4	5
171	25	4	1	1	0	37	1	0	0	0	0	1		3	3	1	1	3	1	2	2	2	2	3	1	1	1	2	3	2	2	3	3	37		4	4	3	4	4	4	3	5	5	5	5	17	19	10
172	27	1	1	1	2	12	0	1	0	0	0	1		4	4	1	1	4	2	2	2	1	4	4	1	1	2	4	2	1	1	2	3	30		4	4	1	3	1	3	1	0	1	3	3	11	10	3
173	28	3	1	1	1	13	0	2	0	0	0	1		3	3	3	1	3	1	1	2	1	3	1	1	1	1	3	3	1	1	3	3	35		4	4	2	2	2	2	2	0	2	2	2	10	8	6
174	28	5	1	1	1	10	1	1	0	3	0	1		3	3	1	2	2	1	2	3	2	2	1	1	1	1	3	3	1	1	2	3	38		4	4	2	2	2	2	5	0	1	1	1	10	5	9
175	24	3	1	1	1	25	0	1	0	1	0	1		4	4	4	1	4	1	1	4	1	4	4	1	1	1	4	4	1	2	4	4	24		3	4	2	5	1	3	1	0	5	5	5	10	20	4
176	31	1	1	1	2	32	1	0	0	0	0	1		3	4	1	1	4	1	2	3	1	3	4	1	1	1	3	4	1	1	3	3	27		4	4	5	3	3	2	5	0	2	3	2	10	10	13
177	31	3	1	1	1	38	1	0	0	0	0	1		3	3	1	1	1	1	3	1	1	3	1	1	2	2	4	4	2	2	3	2	41		4	4	4	3	3	3	4	0	3	3	3	11	12	11
178	20	3	1	1	0	30	0	0	0	0	0	1		3	4	1	1	3	2	2	2	2	1	2	2	2	2	2	2	2	3	2	3	45		3	3	5	5	5	5	3	5	5	5	5	16	20	13
179	32	4	2	1	0	12	1	0	0	0	0	1		3	2	1	2	3	1	2	2	2	2	3	1	1	1	2	2	2	2	3	2	41		4	4	2	2	2	2	2	1	1	1	2	11	6	6
180	29	1	1	1	2	14	1	1	0	0	0	1		4	4	1	1	4	4	1	3	1	4	4	1	1	1	4	4	3	1	4	4	26		1	1	1	1	1	1	1	0	1	1	1	3	4	3
181	36	5	1	1	2	14	1	1	0	0	0	1		2	3	1	1	2	1	1	2	2	2	4	1	1	1	2	2	1	1	2	3	37		2	2	3	3	2	2	2	0	2	2	2	6	9	7
182	33	4	5	1	1	19	0	1	0	0	0	1		4	4	1	1	3	1	1	2	2	4	4	1	1	1	2	2	1	1	3	3	30		2	2	2	2	2	2	2	0	2	2	2	6	8	6
183	21	1	1	1	0	21	1	0	0	0	0	1		4	4	2	1	3	1	1	1	2	2	3	2	2	2	3	2	2	3	3	2	41		1	3	1	1	4	3	4	4	2	1	2	11	6	9
184	35	1	1	1	2	25	1	0	0	0	0	1		3	3	1	1	4	2	1	4	1	4	4	1	1	1	3	4	1	1	3	3	26		1	4	2	1	1	1	1	0	1	1	1	6	4	4
185	34	1	1	1	2	16	1	1	0	0	0	1		4	4	1	1	4	1	4	4	1	4	4	1	1	1	4	4	1	4	4	4	26		2	3	2	2	1	1	1	0	1	1	1	6	5	4
186	30	4	1	1	1	17	1	0	0	0	0	1		4	4	1	1	4	4	4	4	1	4	4	1	1	1	4	4	1	4	4	4	29		1	5	1	1	1	1	1	0	1	1	1	7	4	3
187	33	2	1	1	0	19	1	1	0	0	0	1		4	4	1	1	3	1	1	1	1	3	3	1	1	1	2	3	1	1	3	3	31		3	4	2	2	2	2	3	4	4	4	2	13	12	7
188	19	2	1	1	0	18	1	1	0	0	0	1		4	3	1	1	3	1	1	1	1	3	4	1	1	1	2	2	1	1	2	2	34		3	4	3	4	1	1	1	4	4	1	4	12	13	5
189	22	2	1	1	0	31	1	0	0	0	0	1		3	4	1	1	3	1	1	4	1	4	3	3	1	1	2	2	1	4	4	4	32		2	4	5	2	5	4	5	3	5	4	5	13	16	15
190	19	3	1	1	0	28	1	0	0	0	0	1		2	2	1	3	2	3	1	1	3	2	3	1	1	1	2	3	2	1	2	2	46		5	5	4	2	2	5	4	5	1	1	1	20	5	10
191	25	1	1	1	1	27	1	0	0	0	0	1		4	4	4	1	3	3	3	3	2	3	3	3	2	2	2	3	1	1	3	3	41		3	4	2	3	1	1	1	0	2	2	2	8	9	4
192	27	3	1	1	0	29	1	1	0	0	0	1		4	4	1	1	4	1	1	4	1	4	4	1	1	1	4	4	4	1	4	4	23		5	5	2	4	2	3	2	5	2	4	2	18	12	6
193	33	3	1	1	1	7	1	1.3	0	0	0	1		4	4	1	1	4	3	1	3	1	4	4	1	1	4	4	4	1	4	4	4	29		1	3	1	5	1	1	5	0	1	1	1	5	8	7
194	34	3	3	1	2	15	1	0	0	0	0	1		2	4	1	1	2	3	2	2	2	2	3	1	1	1	2	2	2	1	2	3	41		3	5	1	5	5	5	2	0	1	3	1	13	10	8
195	34	3	1	1	3	16	1	4	2	0	0	1		4	4	1	1	4	1	1	2	1	4	4	1	1	1	4	4	1	1	1	4	25		1	1	1	1	1	1	1	0	3	4	3	3	11	3
196	22	1	1	1	0	37	1	1	0	0	0	1		2	2	1	1	1	1	1	2	2	2	3	1	1	1	1	2	1	1	3	3	40		5	5	5	4	2	5	5	5	1	1	1	20	7	12
197	24	2	1	1	0	6	1	0	0	0	0	1		4	4	1	1	3	4	1	3	1	4	3	1	1	1	4	3	1	1	3	4	28		2	4	2	2	2	2	2	4	2	4	4	12	12	6
198	31	3	1	1	2	17	1	0	0	0	0	1		3	3	1	1	3	1	2	2	1	3	3	1	1	1	3	3	1	1	3	3	32		3	4	3	1	1	3	3	0	3	2	3	10	9	7
199	20	3	1	1	0	9	1	0	0	0	0	1		2	4	1	1	4	1	2	2	3	2	4	1	1	1	4	2	1	2	4	4	32		3	5	5	1	1	1	5	5	1	5	1	14	8	11
200	31	4	1	1	0	39	1	0	0	0	0	1		3	4	1	1	3	2	3	2	2	3	3	1	1	1	2	2	2	2	3	3	38		4	5	2	3	1	4	2	5	4	5	4	18	16	5
201	33	2	1	1	2	31	0	4	0	0	0	1		3	4	1	1	1	2	2	2	2	3	1	1	1	1	1	3	1	2	3	3	40		1	1	1	1	1	1	1	0	1	2	2	3	6	3
202	23	1	1	1	1	22	1	3	0	0	0	1		4	4	4	1	4	1	1	3	1	4	4	1	1	4	3	3	1	2	3	3	32		3	4	1	2	1	2	2	0	2	2	1	9	7	4
203	33	5	5	1	1	20	1	0	0	0	0	1		4	4	1	1	4	1	1	2	4	4	4	1	1	1	3	4	1	2	4	4	27		2	2	2	2	2	2	1	0	2	2	2	6	8	5
204	26	4	5	1	0	32	1	0	0	0	0	1		3	4	1	1	3	1	1	1	4	1	3	1	1	1	2	2	4	1	3	3	41		5	5	5	5	2	5	4	5	5	5	5	20	20	11
205	36	1	1	1	2	6	0	0	0	0	0	1		4	4	1	1	2	2	3	2	2	4	2	1	1	1	1	2	2	1	2	2	40		5	5	1	5	1	5	1	0	1	1	1	15	8	3
206	35	3	1	1	0	22	0	0	3	0	0	1		4	4	1	1	3	1	1	2	1	4	4	1	1	1	2	4	1	1	2	3	28		2	3	1	1	1	3	1	3	4	1	1	11	7	3
207	31	5	1	1	1	15	0	6	0	0	0	1		4	4	1	1	4	1	2	2	1	4	4	1	1	1	4	4	1	1	2	3	26		2	3	1	2	1	1	1	0	3	1	2	6	8	3
208	19	3	1	1	0	35	1	0	0	0	0	1		3	4	1	1	3	1	2	2	2	3	2	1	1	1	3	3	1	1	2	3	34		4	5	2	2	2	5	4	5	4	5	4	19	15	8
209	29	4	2	1	0	36	1	1	0	0	0	1		4	4	2	1	3	1	1	2	3	2	2	1	1	1	4	3	1	1	3	3	33		4	4	4	3	3	3	2	3	2	3	2	14	10	9
210	25	3	1	1	1	6	1	1	0	0	0	1		3	3	1	1	2	1	1	2	2	2	2	1	1	1	2	2	2	1	3	3	38		3	1	4	5	5	5	5	0	5	2	5	9	17	14
211	32	3	3	1	0	22	1	0	0	0	0	1		4	4	1	1	2	1	1	4	2	3	4	1	1	1	2	2	2	1	1	1	35		3	3	1	1	1	3	1	3	1	2	2	12	6	3
212	23	1	1	1	0	23	0	0	0	0	0	1		4	4	4	4	4	1	1	2	1	4	4	1	1	1	4	4	1	1	4	4	28		1	2	1	3	1	5	1	2	1	3	1	10	8	3
213	25	6	6	1	0	29	1	0	0	0	0	1		4	4	1	1	4	4	1	1	1	4	4	1	1	1	4	4	1	1	4	4	26		5	5	5	1	5	5	5	5	1	5	1	20	8	15
214	30	3	1	1	0	27	1	0	0	0	0	1		3	4	1	1	3	1	2	3	2	3	4	1	1	1	3	4	1	3	4	4	29		3	3	2	1	1	2	1	3	2	2	2	11	7	4
215	18	1	1	1	0	34	1	1	0	0	0	1		2	4	1	4	3	2	2	2	1	2	4	2	1	2	2	2	2	2	3	3	42		5	5	2	3	2	5	4	5	5	5	5	20	18	8
216	21	2	1	1	0	25	1	0	0	0	0	1		2	4	1	1	3	2	1	2	2	2	3	1	1	1	1	3	2	1	2	2	39		2	3	3	1	1	1	1	3	1	1	1	9	4	5
217	26	3	1	1	0	14	1	0	0	0	0	1		4	3	1	1	4	1	1	2	2	3	3	1	1	1	3	3	1	1	2	3	31		3	3	2	2	2	3	2	3	2	2	2	12	8	6
218	27	1	1	1	2	24	1	0	0	0	0	1		3	3	1	3	3	1	1	3	1	3	3	1	1	1	3	3	1	2	3	3	33		1	1	1	1	1	1	1	0	1	1	1	3	4	3
219	25	4	1	1	0	20	1	0	0	0	0	1		4	4	1	1	4	1	2	4	1	4	4	1	1	1	4	4	1	1	4	4	21		3	3	1	1	1	1	1	3	1	1	1	10	4	3
220	29	1	1	1	3	30	0	3	0	0	0	1		2	1	3	1	1	2	3	3	4	2	2	2	2	3	2	2	2	3	2	2	56		1	3	4	2	2	1	1	0	1	5	2	5	10	7
221	20	1	1	1	1	16	0	1	0	0	0	0		3	3	1	1	3	2	1	2	1	3	3	1	1	1	3	3	1	1	2	3	33		1	4	4	1	1	2	1	0	2	2	2	7	7	6
222	37	2	1	1	2	34	0	1	0	0	0	1		2	3	4	1	3	2	2	2	2	3	2	4	4	2	3	2	2	2	3	2	50		5	5	4	4	2	3	3	0	1	2	3	13	10	9
223	24	3	1	1	1	39	0	1	0	0	0	1		3	3	2	1	3	2	2	3	2	3	3	2	1	2	2	2	2	1	3	2	40		3	4	2	4	2	4	2	0	2	2	2	11	10	6
224	22	3	1	1	0	14	1	0	0	2	0	1		4	4	1	1	4	1	1	4	1	4	4	1	1	1	4	4	1	1	4	4	20		3	3	2	2	2	3	1	3	2	3	1	12	8	5
225	35	1	1	1	0	24	0	0	0	0	0	1		3	4	1	1	3	1	1	3	1	3	3	1	1	1	3	3	1	1	3	3	29		2	1	2	2	1	2	2	2	2	2	1	7	7	5
226	27	1	1	1	1	15	1	1	0	0	0	1		4	4	4	4	4	3	1	4	1	4	4	1	1	1	4	4	1	1	4	4	28		1	2	1	1	1	1	1	0	1	1	1	4	4	3
227	31	4	6	1	0	31	1	1	0	0	0	1		4	4	1	1	2	1	2	4	1	2	3	1	1	1	2	4	1	1	2	4	30		3	4	3	3	2	3	2	4	3	4	4	14	14	7
228	29	3	1	1	0	18	1	0	0	0	0	1		4	4	1	1	4	2	1	3	1	4	4	1	1	1	4	4	1	2	4	4	23		1	3	1	1	1	1	1	4	1	1	1	9	4	3
229	33	1	1	1	2	30	1	0	0	1	0	1		2	2	2	1	2	3	1	2	2	2	3	3	2	2	2	3	2	1	2	2	47		3	1	1	1	1	1	1	0	1	1	1	5	4	3
230	34	3	1	1	1	39	0	0	0	0	0	1		2	4	1	1	4	1	1	2	1	3	3	1	1	1	4	3	1	1	4	4	27		3	3	3	3	3	3	3	0	3	3	3	9	12	9
231	20	2	1	1	0	39	0	0	0	0	0	1		2	4	1	1	3	2	4	2	3	2	2	1	1	1	2	3	2	4	3	3	44		5	5	5	5	2	4	2	5	4	4	5	19	18	9
232	24	3	1	1	1	25	0	0	0	0	0	1		4	4	1	1	1	1	1	3	1	4	4	1	1	1	3	3	1	3	3	4	29		1	1	1	1	1	1	1	0	1	1	1	3	4	3
233	30	2	1	1	3	32	0	0	0	0	0	1		2	2	2	2	2	1	2	1	1	2	4	2	4	3	2	4	1	4	4	4	45		1	1	1	1	3	5	1	0	4	1	5	7	11	5
234	21	3	1	1	0	39	1	0	1	0	0	1		2	2	3	1	2	1	3	2	4	2	2	1	1	1	1	1	3	2	2	2	52		4	5	4	4	2	4	2	5	4	5	5	18	18	8
235	25	3	1	1	0	31	1	0	0	0	0	1		3	3	2	1	3	1	1	2	2	2	3	3	2	1	1	1	3	3	1	2	48		1	4	3	2	1	1	1	3	3	3	3	9	11	5
236	23	1	1	1	1	26	1	0	0	0	0	1		4	4	1	1	4	4	1	4	1	4	4	1	1	1	4	4	1	1	4	4	23		5	4	1	2	1	1	1	0	1	5	1	10	9	3
237	31	5	1	1	1	26	0	2	0	0	0	1		3	3	1	1	3	1	1	2	2	3	3	1	1	1	3	2	1	2	3	3	34		2	2	3	1	2	1	3	0	1	5	5	5	12	8
238	26	3	1	1	0	37	1	1	0	0	0	1		2	4	1	1	3	1	1	2	2	3	3	1	1	1	3	3	2	1	1	1	37		3	3	3	3	3	3	3	1	2	2	2	10	9	9
239	26	2	1	1	1	19	1	0	0	0	0	1		4	3	2	2	3	2	2	2	2	3	4	2	2	2	2	2	2	2	2	4	41		1	3	1	1	1	1	1	0	1	1	1	5	4	3
240	27	1	1	1	2	26	0	0	0	0	0	1		2	3	3	1	4	3	1	2	2	2	3	2	2	3	2	3	2	1	2	3	44		3	2	2	2	2	2	2	0	1	1	1	7	5	6
241	27	4	1	1	1	18	1	0	0	0	0	1		2	3	2	1	3	1	1	2	1	2	2	1	1	2	2	2	1	1	2	2	40		4	4	3	4	2	2	2	0	3	3	3	10	13	7
242	26	5	1	1	0	17	1	1	0	0	0	1		4	3	1	1	4	1	1	2	1	3	4	1	1	1	3	4	1	1	2	2	29		2	3	1	1	1	1	1	3	2	1	2	9	6	3
243	25	2	1	1	1	14	1	0	0	0	0	1		3	3	1	1	3	1	1	3	1	3	3	1	2	1	3	3	1	2	3	4	31		3	4	1	1	1	1	1	0	1	1	1	8	4	3
244	22	2	1	1	0	21	0	1	0	0	0	1		4	4	1	1	3	1	1	3	1	3	4	1	1	1	3	3	1	1	2	3	28		2	2	3	2	1	2	2	3	2	2	2	9	8	6
245	25	1	1	1	2	25	0	0	0	0	0	0		3	3	2	3	3	1	1	2	2	2	3	2	1	1	1	3	3	1	2	2	43		3	3	1	1	1	1	1	0	1	1	1	7	4	3
246	25	1	1	1	2	17	0	0	0	0	0	0		3	3	2	3	3	1	1	2	2	2	3	2	1	1	1	3	3	1	2	2	43		3	3	1	1	1	1	1	0	1	1	1	7	4	3
247	26	3	3	1	0	9	1	0	0	0	0	1		3	3	2	1	3	1	2	3	2	3	3	1	1	1	3	2	1	1	3	3	34		1	1	1	1	5	5	1	5	3	2	2	12	8	7
248	29	1	1	1	4	32	1	0	0	0	0	1		4	4	2	1	2	2	1	3	3	2	2	4	4	2	1	2	2	3	3	2	49		1	1	1	4	2	5	1	0	5	2	2	7	13	4
249	31	1	1	1	2	8	1	1	0	0	0	1		1	1	1	3	2	1	1	4	3	4	3	2	1	1	3	1	1	1	3	3	40		1	1	2	2	1	2	1	0	2	1	2	4	7	4
250	32	3	1	1	1	28	1	0	0	0	0	1		2	1	1	2	2	1	3	1	3	2	1	1	1	1	1	2	2	2	3	2	50		4	4	1	4	1	1	4	0	4	1	4	9	13	6
251	31	3	4	1	1	36	1	0	0	0	0	1		1	3	2	1	1	2	4	1	4	1	4	1	1	1	1	1	2	1	2	2	52		5	5	1	4	1	1	1	0	4	4	4	11	16	3
252	35	3	1	1	1	35	1	4	0	0	0	1		3	4	1	1	4	1	2	3	2	2	3	1	1	1	3	3	1	1	3	3	31		1	4	1	3	1	3	4	0	1	5	4	8	13	6
253	32	4	5	1	0	38	1	0	0	0	0	1		2	2	1	1	3	2	2	1	2	2	2	1	2	1	2	2	2	1	1	2	46		4	4	5	5	5	4	5	5	3	3	3	17	14	15
254	27	3	1	1	1	33	1	0	0	0	0	1		2	2	1	1	2	2	2	2	2	2	2	1	1	1	2	2	1	1	2	3	42		4	4	3	4	2	3	3	0	3	3	2	11	12	8
255	22	3	1	1	2	10	1	1	0	0	0	1		2	3	2	1	2	3	2	2	1	3	3	1	1	1	2	4	1	2	2	4	38		3	4	3	4	5	5	1	0	1	1	1	12	7	9
256	30	1	3	1	0	29	1	0	0	0	0	1		3	4	1	1	4	1	1	3	1	4	1	1	1	1	3	4	1	2	3	4	28		4	5	4	2	1	2	2	3	2	3	3	14	10	7
257	29	1	1	1	1	38	1	0	0	0	0	1		1	1	2	2	3	2	3	1	3	1	2	1	2	2	1	1	2	1	3	3	53		5	5	5	2	2	5	5	0	2	4	2	15	10	12
258	25	3	1	1	1	19	0	1	0	0	0	1		4	4	1	1	4	3	3	3	1	4	4	1	1	1	2	3	1	1	3	4	29		2	3	1	1	1	3	1	0	1	1	1	8	4	3
259	33	2	1	1	1	10	1	1	0	0	0	1		3	3	2	1	2	1	2	2	2	3	3	1	1	1	3	4	4	3	3	3	39		3	4	1	2	1	2	4	0	1	4	2	9	9	6
260	24	2	1	1	1	28	1	0	0	0	0	1		2	3	1	1	2	2	2	2	1	3	3	1	1	1	3	3	1	1	4	4	33		1	4	2	5	1	1	4	0	2	3	1	6	11	7
261	21	1	1	1	1	8	1	0	0	1	0	1		2	4	2	1	1	3	2	1	2	2	3	1	1	1	1	3	2	1	1	1	47		4	3	1	3	1	1	1	0	2	1	1	8	7	3
262	33	2	1	1	2	20	1	0	0	0	0	1		4	4	1	1	4	1	1	3	1	4	4	1	1	1	4	1	1	1	4	4	24		1	1	1	1	1	1	1	0	1	1	1	3	4	3
263	31	3	1	1	2	16	1	1	0	0	0	1		2	3	1	1	3	1	2	2	2	3	1	1	1	3	3	2	2	1	2	2	42		4	5	4	3	2	3	3	0	3	3	3	12	12	9
264	24	2	1	1	0	12	1	0	0	0	0	1		4	4	1	1	4	1	2	3	1	3	3	1	1	1	3	3	2	1	3	3	29		3	4	2	3	2	3	2	4	3	3	3	14	12	6
265	20	3	1	1	0	27	1	0	0	0	0	1		4	4	2	1	4	1	1	4	1	4	4	1	1	1	4	4	1	2	4	4	22		3	3	1	1	1	3	3	3	1	1	1	12	4	5
266	34	3	1	1	1	13	0	1	0	0	0	1		4	3	1	1	3	1	1	2	1	3	3	1	1	1	3	3	1	1	2	3	31		3	4	1	1	2	4	2	0	2	2	2	11	7	5
267	22	3	1	1	0	6	1	1	0	0	0	1		2	4	2	3	2	1	2	2	3	3	2	2	2	2	2	3	2	2	3	3	45		2	1	5	1	1	1	1	5	1	5	5	9	12	7
268	31	1	1	1	3	33	0	0	0	0	0	1		2	3	2	3	2	3	2	3	2	3	2	3	2	3	2	3	2	3	2	3	50		3	3	3	3	3	3	3	0	3	3	3	9	12	9
269	28	2	1	1	1	29	1	1	0	1	0	1		3	4	1	1	4	1	1	2	1	3	4	1	1	1	3	2	1	1	3	4	28		5	5	1	1	5	5	1	0	1	5	1	15	8	7
270	26	3	1	1	0	26	1	0	0	0	0	1		4	4	1	1	3	2	1	3	1	3	4	1	1	1	3	4	1	1	3	3	27		2	2	2	2	2	3	2	4	2	2	2	11	8	6
271	26	1	1	1	1	34	1	0	0	0	0	1		2	2	2	1	2	1	2	2	3	2	3	1	1	2	2	2	3	1	1	2	47		1	1	3	5	2	1	1	0	3	3	1	3	12	6
272	38	2	1	1	2	35	0	1	3	0	0	1		3	4	1	1	3	2	2	2	3	2	3	2	1	2	3	3	2	2	3	3	39		4	1	2	2	2	2	2	0	1	1	4	7	8	6
273	26	1	3	1	1	31	0	1	0	0	0	1		2	4	4	1	1	1	3	1	2	4	2	1	1	1	4	2	1	3	3	4	41		5	1	5	1	5	4	1	0	5	5	5	10	16	11
274	28	3	1	1	1	21	0	0	0	0	0	1		3	3	2	1	2	2	3	2	2	2	3	1	1	1	2	2	2	2	1	2	45		5	4	2	2	2	2	2	0	2	2	2	11	8	6
275	28	2	1	1	1	13	0	0	0	0	0	1		2	2	1	1	2	2	2	2	2	2	2	1	1	1	2	2	2	2	2	2	45		4	3	2	3	2	2	2	0	2	2	2	9	9	6
276	31	4	5	1	1	27	0	0	0	0	0	1		3	3	2	1	3	1	2	3	2	3	3	2	1	1	3	3	2	2	3	4	35		2	2	2	2	2	2	2	0	2	2	2	6	8	6
277	22	3	1	1	1	15	1	0	0	0	0	1		2	4		1	1	4	2	1	3	1	3	3	1	1	2	2	3	2	1	4	49		3	4	4	2	2	2	1	0	2	2	2	9	8	7
278	41	1	1	1	2	38	0	0	0	0	0	1		2	3	2	1	2	1	3	1	3	2	3	1	1	1	2	2	1	3	3	3	44		4	4	1	3	1	4	1	0	3	5	5	12	16	3
279	19	3	4	1	0	37	1	0	0	0	0	1		2	4	1	1	3	1	1	3	2	2	1	1	1	1	2	3	2	2	3	3	37		5	5	3	2	1	5	1	5	3	4	2	20	11	5
280	31	3	1	1	0	23	0	0	0	0	0	1		4	4	1	1	4	1	1	3	2	4	4	1	2	2	3	4	2	1	4	4	26		3	3	3	3	3	3	3	3	3	3	3	12	12	9
281	39	3	1	1	2	7	0	0	0	0	0	1		3	4	1	4	4	1	2	2	2	3	2	1	1	1	4	4	1	2	4	4	32		5	5	1	1	5	5	1	0	1	1	1	15	4	7
282	31	1	1	1	1	29	0	0	0	0	0	1		3	4	3	1	2	2	2	1	2	2	1	1	1	2	2	1	1	3	3	2	47		1	1	5	2	2	5	5	0	4	4	4	7	14	12
283	32	1	4	1	1	20	0	0	0	0	0	1		3	2	1	1	3	1	2	1	2	2	4	1	2	1	1	2	2	1	2	2	42		2	4	2	2	2	2	2	0	2	2	2	8	8	6
284	26	3	1	1	0	17	1	0	0	0	0	1		4	4	1	1	4	1	1	4	1	4	4	1	1	1	4	4	1	2	4	4	21		2	4	2	2	1	2	2	3	2	2	2	11	8	5
285	33	3	1	1	2	9	0	0	0	0	0	1		4	4	1	4	1	1	1	2	1	4	4	1	1	4	4	1	1	4	1	4	40		2	3	1	1	2	2	1	0	1	1	1	7	4	4
286	25	3	1	1	0	24	1	0	0	0	0	1		4	4	1	1	2	1	1	2	1	2	4	1	1	1	4	4	2	1	4	4	27		2	3	2	2	2	2	2	2	2	4	2	9	10	6
287	30	1	1	1	1	30	1	3	0	0	0	1		3	4	1	1	3	4	1	2	1	4	4	1	1	1	4	4	1	1	4	3	28		2	2	3	2	2	2	3	0	1	2	2	6	7	8
288	38	3	4	1	0	36	0	0	0	0	0	1		2	3	3	2	2	1	3	2	1	2	3	2	2	2	3	3	2	3	3	2	46		4	3	4	4	4	3	4	1	2	3	3	11	12	12
289	22	3	1	1	0	22	1	0	0	3	0	1		3	4	1	3	3	2	1	3	2	2	3	1	1	1	3	3	2	2	3	3	36		3	4	1	1	1	3	1	3	1	1	1	13	4	3
290	19	3	1	1	0	7	1	0	0	0	0	0		3	3	1	1	3	1	1	1	1	3	4	1	1	2	3	3	1	1	4	3	31		3	3	1	1	2	3	3	3	1	1	1	12	4	6
291	36	1	1	1	4	35	0	1.4	0	0	0	0		2	3	2	4	4	1	1	2	1	2	3	1	1	1	4	4	1	4	4	4	35		4	5	5	2	3	3	2	0	1	1	1	12	5	10
292	40	2	1	1	1	21	1	1	0	0	0	1		3	3	1	1	2	1	3	1	3	4	1	4	1	1	3	4	1	2	4	4	39		1	1	1	1	1	1	1	0	1	1	1	3	4	3
293	30	2	1	1	1	11	1	1	0	0	0	1		3	2	1	1	2	2	1	2	2	2	3	1	1	2	2	3	1	1	2	2	40		1	4	3	3	1	3	1	0	1	1	1	8	6	5
294	26	1	1	1	2	27	0	0	0	0	0	1		4	4	1	1	4	2	1	4	1	2	3	1	1	2	3	4	1	1	4	4	26		2	2	2	2	2	2	2	0	2	1	1	6	6	6
295	26	3	1	1	1	12	1	3	2	0	0	1		4	4	1	1	4	1	2	4	1	4	4	1	1	1	4	4	1	1	2	4	23		3	2	2	2	2	2	2	0	2	2	2	7	8	6
296	35	2	1	1	0	36	1	0	0	0	0	1		4	2	1	1	4	2	2	2	2	2	3	1	1	2	2	3	1	1	3	2	37		3	5	2	2	1	5	3	5	3	3	4	18	12	6
297	28	1	4	1	0	23	1	0	0	0	0	1		3	3	1	1	3	1	1	3	1	3	4	1	1	1	3	3	1	1	3	3	29		1	1	1	1	1	1	1	1	1	1	1	4	4	3
298	25	1	1	1	0	15	1	0	0	0	0	0		2	2	2	2	2	2	1	2	2	2	2	2	2	2	2	2	2	2	2	2	49		2	2	2	2	2	2	2	2	2	2	2	8	8	6
299	20	1	1	1	0	11	1	1	0	0	0	1		3	4	2	1	3	2	2	2	2	3	2	1	2	1	3	2	2	1	3	2	39		4	3	1	3	1	5	1	4	3	2	3	16	11	3
300	35	3	3	1	0	28	1	0	0	0	0	1		2	3	1	3	3	3	1	3	3	2	1	1	1	3	3	3	1	2	4	3	42		4	4	4	2	2	4	4	4	5	5	5	16	17	10
[truncated: 83 more columns]
