# Supplementary material for: Cross-cultural adaptation and validation of the Turkish version of the Pregnancy-Specific Anxiety Tool (PSAT-TR): a psychometric study
Source: Research Square preprint supplement (doi:10.21203/rs.3.rs-7834432/v1), 2025-11-19
Supplement: Supplementary file 3 [file 48ea7cfc39e4c8f8ab9dcf60.docx]

Supplementary Table S2. Comparison of EFA and CFA Results for Each Item (PSAT-TR)

| Item | EFA Highest Loading (Factor & Value) | CFA Std. Estimate | CFA Std. Error | CFA z-value | CFA p | CFA 95% CI (Lower–Upper) | CFA Final Factor |
| --- | --- | --- | --- | --- | --- | --- | --- |
| 1 | — | 0.465 | 0.023 | 20.284 | <.001 | 0.420–0.510 | F1 |
| 2 | F1 – 0.680 | 0.731 | 0.030 | 24.025 | <.001 | 0.671–0.791 | F1 |
| 3 | F1 – 0.696 | 0.762 | 0.032 | 23.966 | <.001 | 0.699–0.824 | F1 |
| 4 | F1 – 0.828 | 0.789 | 0.032 | 24.283 | <.001 | 0.725–0.852 | F1 |
| 5 | F1 – 0.661 | 0.735 | 0.033 | 21.990 | <.001 | 0.669–0.800 | F1 |
| 6 | F1 – 0.780 | 0.741 | 0.032 | 22.986 | <.001 | 0.677–0.804 | F1 |
| 7 | F1 – 0.746 | 0.775 | 0.035 | 21.976 | <.001 | 0.706–0.844 | F1 |
| 8 | F1 – 0.634 | 0.787 | 0.034 | 23.209 | <.001 | 0.720–0.853 | F1 |
| 9 | F1 – 0.429 / F3 – 0.515 | 0.799 | 0.044 | 18.017 | <.001 | 0.712–0.886 | F1 |
| 10 | F1 – 0.472 / F3 – 0.478 | 0.824 | 0.048 | 17.108 | <.001 | 0.730–0.919 | F1 |
| 11 | F3 – 0.693 | 0.744 | 0.045 | 16.714 | <.001 | 0.657–0.831 | F1 |
| 12 | F1 – 0.612 / F3 – 0.507 | 0.761 | 0.045 | 16.787 | <.001 | 0.672–0.849 | F1 |
| 13 | F3 – 0.777 | 0.696 | 0.044 | 15.871 | <.001 | 0.610–0.782 | F1 |
| 14 | F3 – 0.534 | 0.789 | 0.034 | 23.110 | <.001 | 0.722–0.855 | F1 |
| 15 | — | 0.741 | 0.044 | 16.855 | <.001 | 0.655–0.827 | F2 |
| 16 | F2 – 0.630 | 0.628 | 0.029 | 21.500 | <.001 | 0.571–0.685 | F2 |
| 17 | F2 – 0.869 | 0.703 | 0.039 | 17.906 | <.001 | 0.626–0.780 | F2 |
| 18 | F2 – 0.857 | 0.739 | 0.043 | 17.362 | <.001 | 0.656–0.823 | F2 |
| 19 | F3 – 0.460 | 0.331 | 0.025 | 13.001 | <.001 | 0.281–0.381 | F2 |
| 20 | — | 0.676 | 0.030 | 22.544 | <.001 | 0.617–0.735 | F3 |
| 21 | F2 – 0.737 | 0.754 | 0.038 | 19.702 | <.001 | 0.679–0.829 | F3 |
| 22 | F2 – 0.500 | 0.680 | 0.033 | 20.663 | <.001 | 0.615–0.744 | F3 |
| 23 | F2 – 0.433 | 0.711 | 0.036 | 19.653 | <.001 | 0.640–0.782 | F3 |
| 24 | F5 – 0.478 | 0.624 | 0.051 | 12.325 | <.001 | 0.525–0.724 | F4 |
| 25 | F5 – 0.512 | 0.630 | 0.051 | 12.429 | <.001 | 0.531–0.729 | F4 |
| 26 | F5 – 0.418 | 0.585 | 0.059 | 10.002 | <.001 | 0.471–0.700 | F4 |
| 27 | F6 – –0.467 | 0.508 | 0.049 | 10.352 | <.001 | 0.412–0.604 | F5 |
| 28 | F5 – 0.659 | 0.677 | 0.056 | 12.067 | <.001 | 0.567–0.787 | F5 |
| 29 | F5 – 0.932 | 0.535 | 0.056 | 9.642 | <.001 | 0.426–0.644 | F5 |
| 30 | F4 – 0.650 | 1.070 | 0.068 | 15.776 | <.001 | 0.937–1.202 | F6 |
| 31 | F4 – 0.828 | 0.563 | 0.049 | 11.427 | <.001 | 0.466–0.659 | F6 |
| 32 | F4 – 0.867 | 0.855 | 0.054 | 15.701 | <.001 | 0.749–0.962 | F6 |
| 33 | F4 – 0.934 | 0.757 | 0.050 | 15.006 | <.001 | 0.658–0.856 | F6 |

*Legend.*  EFA = Exploratory Factor Analysis; CFA = Confirmatory Factor Analysis.
The table presents standardized factor loadings from exploratory and confirmatory factor analyses.
Cross-loadings are shown where an item loaded > 0.40 on multiple factors in EFA.All CFA loadings were statistically significant (p < .001).
