# Supplementary material for: Cross-cultural adaptation and validation of the Turkish version of the Pregnancy-Specific Anxiety Tool (PSAT-TR): a psychometric study
Source: Research Square preprint supplement (doi:10.21203/rs.3.rs-7834432/v1), 2025-11-19
Supplement: Supplementary file 4 [file 69c9ed9745bc4fb1694f1f05.docx]

Supplementary Table S3. Factor Covariances among PSAT-TR Subscales (Confirmatory Factor Analysis)

| Variables | Std. Estimate | Std. Error | z-value | p | 95% CI (Lower–Upper) |
| --- | --- | --- | --- | --- | --- |
| F1–F2 | 0.757 | 0.026 | 29.510 | <.001 | 0.706–0.807 |
| F1–F3 | 0.722 | 0.024 | 29.892 | <.001 | 0.675–0.770 |
| F1–F4 | 0.801 | 0.054 | 14.739 | <.001 | 0.695–0.908 |
| F1–F5 | 0.561 | 0.041 | 13.371 | <.001 | 0.479–0.644 |
| F1–F6 | 0.246 | 0.014 | 17.519 | <.001 | 0.219–0.274 |
| F2–F3 | 0.846 | 0.042 | 19.929 | <.001 | 0.763–0.929 |
| F2–F4 | 0.775 | 0.067 | 11.608 | <.001 | 0.644–0.905 |
| F2–F5 | 0.549 | 0.058 | 9.388 | <.001 | 0.435–0.664 |
| F2–F6 | 0.217 | 0.026 | 8.464 | <.001 | 0.167–0.266 |
| F3–F4 | 0.839 | 0.072 | 11.723 | <.001 | 0.699–0.980 |
| F3–F5 | 0.557 | 0.058 | 9.565 | <.001 | 0.443–0.671 |
| F3–F6 | 0.252 | 0.027 | 9.206 | <.001 | 0.199–0.306 |
| F4–F5 | 0.788 | 0.096 | 8.197 | <.001 | 0.599–0.978 |
| F4–F6 | 0.444 | 0.049 | 9.044 | <.001 | 0.348–0.541 |
| F5–F6 | 0.458 | 0.049 | 9.365 | <.001 | 0.362–0.554 |

*Legend. All standardized covariances were positive and statistically significant (p < .001). Covariance estimates ranged from 0.217 to 0.846 among the six PSAT-TR subscales.
Abbreviations: Std. Est. = Standardized Estimate; SE = Standard Error; CI = Confidence Interval; PSAT-TR = Turkish version of the Pregnancy-Specific Anxiety Tool.*
