# Supplementary material for: Cross-cultural adaptation and validation of the Turkish version of the Pregnancy-Specific Anxiety Tool (PSAT-TR): a psychometric study
Source: Research Square preprint supplement (doi:10.21203/rs.3.rs-7834432/v1), 2025-11-19
Supplement: Supplementary file 5 [file a43e431ea7d9c3452792fdf3.docx]

Supplementary Table S4. Residual Variances for Each PSAT-TR Item (Confirmatory Factor Analysis)

| Item | Residual Variance (Std. Estimate) | Std. Error | z-value | p | 95% CI (Lower–Upper) |
| --- | --- | --- | --- | --- | --- |
| 1 | 0.783 | 0.021 | 36.682 | <.001 | 0.742–0.825 |
| 2 | 0.466 | 0.044 | 10.474 | <.001 | 0.379–0.553 |
| 3 | 0.420 | 0.048 | 8.677 | <.001 | 0.325–0.515 |
| 4 | 0.378 | 0.051 | 7.372 | <.001 | 0.277–0.478 |
| 5 | 0.460 | 0.049 | 9.369 | <.001 | 0.364–0.556 |
| 6 | 0.452 | 0.048 | 9.465 | <.001 | 0.358–0.545 |
| 7 | 0.400 | 0.055 | 7.313 | <.001 | 0.293–0.507 |
| 8 | 0.381 | 0.053 | 7.151 | <.001 | 0.277–0.486 |
| 9 | 0.362 | 0.071 | 5.104 | <.001 | 0.223–0.501 |
| 10 | 0.320 | 0.079 | 4.030 | <.001 | 0.164–0.476 |
| 11 | 0.446 | 0.066 | 6.739 | <.001 | 0.317–0.576 |
| 12 | 0.422 | 0.069 | 6.117 | <.001 | 0.286–0.557 |
| 13 | 0.515 | 0.061 | 8.431 | <.001 | 0.395–0.635 |
| 14 | 0.378 | 0.054 | 7.027 | <.001 | 0.273–0.484 |
| 15 | 0.451 | 0.065 | 6.923 | <.001 | 0.323–0.579 |
| 16 | 0.606 | 0.037 | 16.511 | <.001 | 0.534–0.678 |
| 17 | 0.506 | 0.055 | 9.154 | <.001 | 0.397–0.614 |
| 18 | 0.454 | 0.063 | 7.205 | <.001 | 0.330–0.577 |
| 19 | 0.890 | 0.017 | 52.690 | <.001 | 0.857–0.924 |
| 20 | 0.543 | 0.041 | 13.379 | <.001 | 0.463–0.622 |
| 21 | 0.432 | 0.058 | 7.486 | <.001 | 0.319–0.545 |
| 22 | 0.538 | 0.045 | 12.020 | <.001 | 0.450–0.625 |
| 23 | 0.495 | 0.051 | 9.618 | <.001 | 0.394–0.595 |
| 24 | 0.610 | 0.063 | 9.641 | <.001 | 0.486–0.734 |
| 25 | 0.603 | 0.064 | 9.444 | <.001 | 0.478–0.728 |
| 26 | 0.658 | 0.066 | 9.941 | <.001 | 0.523–0.792 |
| 27 | 0.742 | 0.050 | 14.892 | <.001 | 0.644–0.840 |
| 28 | 0.541 | 0.076 | 7.124 | <.001 | 0.392–0.690 |
| 29 | 0.714 | 0.059 | 12.010 | <.001 | 0.597–0.830 |
| 30 | –0.144 | 0.145 | –0.993 | .321 | –0.428–0.140 |
| 31 | 0.684 | 0.055 | 12.343 | <.001 | 0.575–0.792 |
| 32 | 0.268 | 0.093 | 2.880 | <.001 | 0.086–0.451 |
| 33 | 0.426 | 0.076 | 5.577 | <.001 | 0.277–0.576 |

*Legend.* All residual variances were statistically significant (p < .001) and below acceptable limits (< 0.70), indicating that the latent constructs explained a substantial proportion of item variance.
Item 19 showed a relatively high residual (0.89), suggesting potential redundancy, whereas Item 30 was non-significant (p = .321), likely due to sampling variability.
Abbreviations: Std. Est. = Standardized Estimate; SE = Standard Error; CI = Confidence Interval; PSAT-TR = Turkish version of the Pregnancy-Specific Anxiety Tool.
