# Supplementary material for: Cross-cultural adaptation and validation of the Turkish version of the Pregnancy-Specific Anxiety Tool (PSAT-TR): a psychometric study
Source: Research Square preprint supplement (doi:10.21203/rs.3.rs-7834432/v1), 2025-11-19
Supplement: Supplementary file 6 [file a6d37d2c566f16e5489b1c62.docx]

Supplementary Table S5. Item-wise Content Validity Index (CVI) and Content Validity Ratio (CVR) Results for the PSAT-TR

| Item | I-CVI | CVR | Acceptable Thresholds (≥ 0.78) |
| --- | --- | --- | --- |
| 1–9 | 1.000 | 1.000 | ✓ |
| 10 | 1.000 | 0.714 | ✓ |
| 11–14 | 1.000 | 1.000 | ✓ |
| 15 | 1.000 | 0.714 | ✓ |
| 16–18 | 1.000 | 1.000 | ✓ |
| 19 | 1.000 | 0.714 | ✓ |
| 20–25 | 1.000 | 1.000 | ✓ |
| 26 | 1.000 | 0.714 | ✓ |
| 27–30 | 1.000 | 1.000 | ✓ |
| 31 | 1.000 | 0.714 | ✓ |
| 32–33 | 1.000 | 1.000 | ✓ |

S-CVI/Ave = 1.000

S-CVI/UA = 1.000

Mean CVR (Lawshe) = 0.957

*Legend.* Seven experts (four obstetricians and three psychiatrists) evaluated each item for relevance and necessity. I-CVI represents the proportion of experts rating an item as “appropriate” (3) or “very appropriate” (4). CVR values were calculated according to Lawshe’s method (1975). All items exceeded the minimum acceptable thresholds (CVI ≥ 0.78, CVR ≥ 0.78), indicating strong content validity.
Abbreviations: CVI = Content Validity Index; CVR = Content Validity Ratio; I-CVI = Item-level CVI; S-CVI = Scale-level CVI; PSAT-TR = Turkish version of the Pregnancy-Specific Anxiety Tool.
