# Supplementary material for: Cross-cultural adaptation and validation of the Turkish version of the Pregnancy-Specific Anxiety Tool (PSAT-TR): a psychometric study
Source: Research Square preprint supplement (doi:10.21203/rs.3.rs-7834432/v1), 2025-11-19
Supplement: Supplementary file 7 [file b4c328512025fedd2b2a85f7.docx]

Supplementary Table S1. Test–retest reliability analysis of the Turkish version of the Pregnancy-Specific Anxiety Tool (PSAT-TR) (n = 50)

| **Faktor** | **Mean (Test)** | **Mean (Retest)** | **Pearson r (95% CI)** | **p (r)** | **t (paired)** | **p (t)** | **Mean diff (TEST–RE) (95% CI)** | **Cohen’s dz** | **ICC(2,1)** |
| --- | --- | --- | --- | --- | --- | --- | --- | --- | --- |
| F1 – Severity of anxiety | 26.9 | 27.3 | 0.937 [0.89, 0.96] | <0.001 | −1.868 | 0.0677 | −0.42 [−0.88, 0.03] | −0.35 | 0.909 |
| F2 – Health and well-being of baby | 13.3 | 14.0 | 0.949 [0.91, 0.97] | <0.001 | −2.221 | 0.0310 | −0.70 [−1.34, −0.06] | −0.45 | 0.931 |
| F3 – Labor and maternal well-being | 10.8 | 11.3 | 0.955 [0.92, 0.97] | <0.001 | −3.989 | 0.0002 | −0.45 [−0.67, −0.22] | −0.62 | 0.917 |
| F4 – Postpartum concerns | 7.4 | 7.6 | 0.941 [0.89, 0.96] | <0.001 | −1.043 | 0.3018 | −0.17 [−0.50, 0.16] | −0.21 | 0.936 |
| F5 – Career and finance | 6.0 | 6.1 | 0.979 [0.96, 0.99] | <0.001 | 0.000 | 1.000 | 0.00 [−0.35, 0.35] | 0.00 | 0.979 |
| F6 – Support | 6.8 | 7.1 | 0.962 [0.93, 0.98] | <0.001 | −1.581 | 0.120 | −0.32 [−0.72, 0.08] | −0.30 | 0.955 |
| TOTAL | 12.9 | 13.3 | 0.970 [0.94, 0.98] | <0.001 | −1.762 | 0.084 | −0.37 [−0.79, 0.05] | −0.34 | 0.964 |

*Legend.* Values represent mean test and retest scores, Pearson correlation coefficients (95% CI), paired-sample t-test results, mean differences (Test – Retest), Cohen’s dz effect sizes, and ICC (2,1) values for each factor and total score.
ICC (2,1) values were computed using a two-way random-effects, absolute-agreement, single-measure model. p < 0.05 was considered statistically significant.
