# Supplementary material for: Cross-cultural adaptation and validation of the Turkish version of the Pregnancy-Specific Anxiety Tool (PSAT-TR): a psychometric study
Source: Research Square preprint supplement (doi:10.21203/rs.3.rs-7834432/v1), 2025-11-19
Supplement: Supplementary file 8 [file cc7f742dbaa40d4db2df4c10.docx]

Supplementary Table S7. Between-group comparisons of PSAT-TR total scores according to pregnancy planning status, educational level, and adverse obstetric history

| Variable | Group | n | Mean ± SD | Median (IQR) | U | p value | Effect size (r) | Cliff’s δ |
| --- | --- | --- | --- | --- | --- | --- | --- | --- |
| **Pregnancy planning** (0 = unplanned, 1 = planned) | Unplanned | 94 | 10.89 ± 3.38 | 10.14 (4.86) | 10080.0 | 0.568 | 0.033 | 0.084 |
| Planned | 206 | 10.48 ± 2.88 | 9.93 (4.11) |
| **Education level** (0 = primary/secondary, 1 = high school or higher) | Primary/Secondary | 141 | 10.79 ± 3.07 | 10.61 (4.63) | 11996.5 | 0.294 | 0.061 | 0.051 |
| High school or higher | 159 | 10.44 ± 3.02 | 9.61 (4.09) |
| **Adverse obstetric history** (0 = none, 1 = present) | None | 197 | 10.55 ± 3.12 | 10.00 (4.74) | 9636.0 | 0.476 | 0.041 | −0.053 |
| Present | 103 | 10.72 ± 2.91 | 9.87 (3.87) |

*Legend.* Mann–Whitney U tests were conducted to assess group differences. No significant differences were found (all p > 0.05), and effect size estimates (r and Cliff’s δ) indicated small practical differences.
Abbreviations: PSAT-TR = Turkish version of the Pregnancy-Specific Anxiety Tool; SD = Standard Deviation; IQR = Interquartile Range; U = Mann–Whitney U statistic; r = Effect size (Pearson’s r); Cliff’s δ = Cliff’s delta effect size.
